# Supplementary material
Source: Research Square preprint supplement (doi:10.21203/rs.3.rs-10067407/v1)
Supplement: Supplementary file 1 [file c11ce250b4ca8a91eb74e95a.docx]

**Standardized prompts template:**

“You are an expert ophthalmologist taking the Ophthalmic Knowledge Assessment Program (OKAP) examination. Select the single best answer to the following multiple-choice question.”

Instructions:

- Choose only one answer: A, B, C, or D.
- End your response with exactly these two lines:
  FINAL ANSWER: [A/B/C/D]
  CONFIDENCE: [0-100]
- Do not write anything after these two lines.

Question: [Insert question stem here]

Options:
A) [Option A]
B) [Option B]
C) [Option C]
D) [Option D]

*(Note: confidence was omitted for OpenEvidence).*

**Supplementary Table 1. Pairwise matched comparisons between models.**

| Model A | Model B | chi2 | Adjusted P value |
| --- | --- | --- | --- |
| Gemini-Pro-3 | DeepSeek-v3.2 | 122.7 | < 0.001 |
| DeepSeek-v3.2 | OpenEvidence | 55.44 | < 0.001 |
| DeepSeek-v3.2 | Claude-Opus-4.6 | 54.84 | < 0.001 |
| Gemini-Pro-3 | ChatGPT-5.4-Pro | 52.51 | < 0.001 |
| ChatGPT-5.4-Pro | DeepSeek-v3.2 | 33.45 | < 0.001 |
| Gemini-Pro-3 | OpenEvidence | 30.12 | < 0.001 |
| Gemini-Pro-3 | Claude-Opus-4.6 | 19.38 | < 0.001 |
| ChatGPT-5.4-Pro | Claude-Opus-4.6 | 6.08 | 0.041 |
| ChatGPT-5.4-Pro | OpenEvidence | 3.96 | 0.093 |
| OpenEvidence | Claude-Opus-4.6 | 0.4 | 0.526 |

Head-to-head comparisons of model performance on matched items using McNemar’s test. For each pair, the chi-square statistic, P value, and Holm-adjusted P value are shown.

**Supplementary Table 2. Coverage and accuracy at prespecified confidence thresholds.**

| **Model** | **Overall accuracy** **% (n/N) [95% CI]** | **Coverage ≥70%** **% (n/N)** | **Accuracy at ≥70%** **% (n/N) [95% CI]** | **Coverage ≥80%** **% (n/N)** | **Accuracy at ≥80%** **% (n/N) [95% CI]** | **Coverage ≥90%** **% (n/N)** | **Accuracy at ≥90%** **% (n/N) [95% CI]** |
| --- | --- | --- | --- | --- | --- | --- | --- |
| **Gemini-Pro-3** | 95.8% (631/659) [93.9–97.0] | 100.0% (659/659) | 95.8% (631/659) [93.9–97.0] | 100.0% (659/659) | 95.8% (631/659) [93.9–97.0] | 96.4% (635/659) | 97.0% (616/635) [95.4–98.1] |
| **Claude-Opus-4.6** | 89.2% (588/659) [86.6–91.4] | 92.1% (607/659) | 91.1% (553/607) [88.6–93.1] | 71.5% (471/659) | 94.5% (445/471) [92.0–96.2] | 34.3% (226/659) | 99.6% (225/226) [97.5–99.9] |
| **ChatGPT-5.4-Pro** | 84.8% (559/659) [81.9–87.4] | 99.4% (655/659) | 84.9% (556/655) [81.9–87.4] | 88.9% (586/659) | 87.7% (514/586) [84.8–90.1] | 66.2% (436/659) | 94.3% (411/436) [91.7–96.1] |
| **DeepSeek-v3.2** | 73.7% (486/659) [70.3–77.0] | 99.8% (658/659) | 73.7% (485/658) [70.2–76.9] | 73.9% (487/659) | 75.6% (368/487) [71.6–79.2] | 44.6% (294/659) | 82.7% (243/294) [77.9–86.6] |
| **OpenEvidence** | 88.0% (580/659) [85.3–90.3] | NA | NA | NA | NA | NA | NA |

This table summarizes model coverage and accuracy at prespecified self-reported confidence thresholds of ≥70%, ≥80%, and ≥90%. Coverage indicates the proportion of all responses with a confidence score at or above the specified threshold. Threshold-specific accuracy indicates the proportion of correct answers among responses meeting that threshold. Overall accuracy and threshold-specific accuracy are presented with Wilson 95% confidence intervals. Confidence-threshold analyses were performed only for models with available self-reported confidence scores; OpenEvidence was not included in these analyses because no confidence output was available. Abbreviations: CI, confidence interval; ECE, expected calibration error; LLM, large language model; NA, not available.

**Supplementary Table 3. Post hoc questions answered incorrectly by all models**

| Model | Question semantics | Topic comprehension | Logical reasoning | Distractor exclusion | Reference validity | Final answer accuracy |
| --- | --- | --- | --- | --- | --- | --- |
| Gemini-Pro-3 | 9/9 (100.0%) | 9/9 (100.0%) | 3/9 (33.3%) | 9/9 (100.0%) | 5/9 (55.6%) | 2/9 (22.2%) |
| Claude-Opus-4.6 | 8/9 (88.9%) | 9/9 (100.0%) | 5/9 (55.6%) | 9/9 (100.0%) | 4/9 (44.4%) | 1/9 (11.1%) |
| OpenEvidence | 9/9 (100.0%) | 9/9 (100.0%) | 7/9 (77.8%) | 8/9 (88.9%) | 4/9 (44.4%) | 3/9 (33.3%) |
| ChatGPT-5.4-Pro | 9/9 (100.0%) | 9/9 (100.0%) | 5/9 (55.6%) | 8/9 (88.9%) | 7/9 (77.8%) | 2/9 (22.2%) |
| DeepSeek-v3.2 | 7/9 (77.8%) | 9/9 (100.0%) | 9/9 (100.0%) | 9/9 (100.0%) | 4/9 (44.4%) | 5/9 (55.6%) |

This table summarizes model performance across six domains across 9 questions answered incorrectly by all models: semantics, topic comprehension, logical reasoning, distractor exclusion, reference validity, and final answer accuracy. Data are presented as counts and percentages, with higher values indicating correct performance in the specified domain.
